# Supplementary material
Source: PubMed Central journal article supplement (PMC3628413)
Supplement: NIHMS435924-supplement-01.pdf [file NIHMS435924-supplement-01.pdf]

**Table S1.** National Kidney Foundation list of 37 unique herbs potentially harmful in the setting of CKD (<http://www.kidney.org/atoz/content/herbalsupp.cfm>)

| Potentially toxic to the kidneys       | Potentially harmful in CKD |                | Known to be unsafe for all people |
|----------------------------------------|----------------------------|----------------|-----------------------------------|
| artemisia absinthium (wormwood plant)* | alfalfa*                   | ginger*        | chapparal                         |
| autumn crocus                          | aloe*                      | ginseng*       | comfrey                           |
| chui fong tuokuwan (black pearl)       | bayberry*                  | horsetail*     | ephedra (ma huang)*               |
| horse chestnut                         | blue cohosh                | licorice*      | lobelia                           |
| periwinkle                             | broom*                     | mate           | mandrake                          |
| <i>sassafras</i>                       | buckthorn*                 | nettle*        | pennyroyal                        |
| tung shueh                             | capsicum*                  | noni juice*    | pokeroot*                         |
| vandelia cordifolia                    | casarea*                   | panax*         | <i>sassafras</i>                  |
|                                        | coltsfoot                  | rhubarb*       | <i>senna</i> *                    |
|                                        | dandelion*                 | <i>senna</i> * | yohimbe*                          |
|                                        |                            | vervain        |                                   |

Italics, herb listed in more than one category but only counted once as a unique herb.

\*Identified in dietary supplements reportedly taken in study population
