# Supplementary material
Source: PubMed Central journal article supplement (PMC3628413)
Supplement: NIHMS435924-supplement-02.pdf [file NIHMS435924-supplement-02.pdf]

**Table S2.** Point estimated prevalence of dietary supplement use among U.S. adults (age ≥20 years) by characteristic, overall and by CKD status (as defined by MDRD equation) (n=21,169), NHANES 1999-2008

|                                     |                                         | % Using Dietary Supplement Type Within Characteristic Subgroup (row)<br>Overall and by CKD Status |               |                                |               |                                |               |                                |               |                                |               | p-value <sup>a</sup> |
|-------------------------------------|-----------------------------------------|---------------------------------------------------------------------------------------------------|---------------|--------------------------------|---------------|--------------------------------|---------------|--------------------------------|---------------|--------------------------------|---------------|----------------------|
|                                     |                                         | Overall                                                                                           |               | No CKD<br>44.5                 |               | At risk for CKD<br>39.4        |               | CKD stage 1/2<br>8.0           |               | CKD stage 3/4<br>8.1           |               |                      |
| Characteristic                      | % Population by Characteristic (column) | Any Potentially Harmful<br>8.0                                                                    | Other<br>44.5 | Any Potentially Harmful<br>8.4 | Other<br>40.1 | Any Potentially Harmful<br>8.0 | Other<br>46.5 | Any Potentially Harmful<br>6.2 | Other<br>43.7 | Any Potentially Harmful<br>6.6 | Other<br>59.2 |                      |
| Age group, years                    |                                         |                                                                                                   |               |                                |               |                                |               |                                |               |                                |               | <0.001               |
| 20-44                               | 49.0                                    | 7.6                                                                                               | 35.1          | 8.0                            | 34.4          | 7.1                            | 36.3          | 5.4                            | 32.2          | 7.6                            | 49.2          |                      |
| 45-64                               | 33.8                                    | 9.5                                                                                               | 48.7          | 9.7                            | 49.1          | 9.7                            | 48.3          | 7.9                            | 43.8          | 8.5                            | 55.3          |                      |
| ≥65                                 | 17.2                                    | 6.0                                                                                               | 62.9          | 6.0                            | 66.4          | 6.5                            | 64.1          | 5.0                            | 58.4          | 5.7                            | 61.9          |                      |
| Gender                              |                                         |                                                                                                   |               |                                |               |                                |               |                                |               |                                |               | 0.03                 |
| Male                                | 50.2                                    | 7.7                                                                                               | 38.7          | 7.4                            | 35.0          | 8.4                            | 40.8          | 6.0                            | 38.8          | 6.6                            | 64.3          |                      |
| Female                              | 49.8                                    | 8.3                                                                                               | 50.3          | 9.6                            | 45.6          | 7.7                            | 52.4          | 6.3                            | 48.0          | 6.6                            | 51.2          |                      |
| Race/ethnicity                      |                                         |                                                                                                   |               |                                |               |                                |               |                                |               |                                |               | <0.001               |
| Non-Hispanic White                  | 72.0                                    | 8.7                                                                                               | 49.6          | 9.3                            | 45.1          | 8.9                            | 51.3          | 6.2                            | 50.9          | 7.3                            | 61.9          |                      |
| Non-Hispanic Black                  | 10.3                                    | 6.0                                                                                               | 30.1          | 6.6                            | 27.3          | 6.0                            | 31.2          | 5.8                            | 29.5          | 0.9                            | 42.9          |                      |
| Mexican American                    | 7.6                                     | 5.4                                                                                               | 25.2          | 5.4                            | 22.2          | 5.8                            | 27.7          | 4.7                            | 29.9          | 1.8                            | 41.7          |                      |
| Other                               | 10.1                                    | 6.4                                                                                               | 37.2          | 6.8                            | 32.6          | 5.8                            | 42.3          | 7.7                            | 34.1          | 3.8                            | 46.5          |                      |
| Income <sup>b</sup>                 |                                         |                                                                                                   |               |                                |               |                                |               |                                |               |                                |               | <0.001               |
| PIR≤1                               | 12.2                                    | 3.6                                                                                               | 30.0          | 3.0                            | 25.6          | 4.5                            | 32.3          | 3.0                            | 30.6          | 3.0                            | 44.5          |                      |
| PIR >1-<3                           | 33.9                                    | 7.3                                                                                               | 40.4          | 8.1                            | 33.1          | 7.1                            | 42.7          | 6.9                            | 41.8          | 5.7                            | 59.9          |                      |
| PIR≥3                               | 53.9                                    | 9.3                                                                                               | 50.3          | 9.8                            | 47.1          | 9.4                            | 51.8          | 6.8                            | 50.7          | 8.2                            | 61.9          |                      |
| Education                           |                                         |                                                                                                   |               |                                |               |                                |               |                                |               |                                |               | <0.001               |
| < High school                       | 19.8                                    | 4.2                                                                                               | 31.3          | 4.1                            | 22.5          | 3.9                            | 33.7          | 4.9                            | 33.1          | 4.5                            | 50.4          |                      |
| High school                         | 25.6                                    | 6.5                                                                                               | 42.6          | 7.1                            | 35.7          | 6.7                            | 45.7          | 3.0                            | 43.7          | 5.7                            | 61.3          |                      |
| > High school                       | 54.6                                    | 10.0                                                                                              | 50.2          | 10.2                           | 47.0          | 10.3                           | 51.7          | 8.7                            | 50.5          | 8.4                            | 63.3          |                      |
| Diabetes                            |                                         |                                                                                                   |               |                                |               |                                |               |                                |               |                                |               | <0.001               |
| No                                  | 92.5                                    | 8.1                                                                                               | 44.2          | 8.4                            | 40.1          | 8.3                            | 46.2          | 6.6                            | 44.5          | 6.9                            | 60.4          |                      |
| Yes                                 | 7.5                                     | 5.6                                                                                               | 47.8          | -                              | -             | 6.2                            | 48.2          | 4.7                            | 41.2          | 5.2                            | 54.4          |                      |
| Hypertension                        |                                         |                                                                                                   |               |                                |               |                                |               |                                |               |                                |               | <0.001               |
| No                                  | 51.4                                    | 8.3                                                                                               | 41.0          | 8.4                            | 40.1          | 8.0                            | 43.9          | 4.8                            | 42.4          | 9.2                            | 58.4          |                      |
| Yes                                 | 48.6                                    | 7.6                                                                                               | 48.1          | -                              | -             | 9.1                            | 46.6          | 6.9                            | 44.4          | 5.8                            | 59.5          |                      |
| Cardiovascular disease <sup>c</sup> |                                         |                                                                                                   |               |                                |               |                                |               |                                |               |                                |               | <0.001               |
| No                                  | 91.3                                    | 8.1                                                                                               | 43.6          | 8.4                            | 40.1          | 8.2                            | 45.9          | 6.4                            | 42.0          | 7.4                            | 59.9          |                      |
| Yes                                 | 8.7                                     | 6.0                                                                                               | 53.0          | -                              | -             | 6.8                            | 50.1          | 5.2                            | 54.7          | 4.8                            | 57.9          |                      |
| Arthritis                           |                                         |                                                                                                   |               |                                |               |                                |               |                                |               |                                |               | <0.001               |
| No                                  | 75.8                                    | 8.0                                                                                               | 41.1          | 8.3                            | 39.0          | 8.2                            | 42.3          | 6.4                            | 39.4          | 6.9                            | 55.2          |                      |

|                                               |      |     |      |      |      |     |      |     |      |     |      |        |
|-----------------------------------------------|------|-----|------|------|------|-----|------|-----|------|-----|------|--------|
| Yes                                           | 24.2 | 7.7 | 54.9 | 9.6  | 47.1 | 7.6 | 56.8 | 5.9 | 52.5 | 6.3 | 63.1 |        |
| Cancer                                        |      |     |      |      |      |     |      |     |      |     |      | <0.001 |
| No                                            | 91.7 | 7.9 | 42.9 | 8.4  | 39.1 | 7.9 | 45.0 | 6.4 | 41.9 | 6.5 | 58.2 |        |
| Yes                                           | 8.3  | 8.6 | 61.2 | 10.2 | 61.0 | 9.4 | 60.8 | 4.5 | 59.4 | 6.9 | 63.2 |        |
| Significant tobacco use <sup>d</sup>          |      |     |      |      |      |     |      |     |      |     |      | 0.08   |
| No/Past                                       | 74.6 | 8.8 | 48.3 | 9.4  | 43.7 | 8.9 | 50.2 | 6.7 | 47.2 | 6.8 | 61.5 |        |
| Ongoing                                       | 25.4 | 5.7 | 33.2 | 6.1  | 31.1 | 5.3 | 34.8 | 4.9 | 34.3 | 4.7 | 43.4 |        |
| Heavy alcohol use <sup>e</sup>                |      |     |      |      |      |     |      |     |      |     |      | 0.004  |
| No                                            | 71.7 | 8.2 | 45.3 | 8.9  | 40.7 | 8.2 | 48.1 | 5.4 | 44.0 | 7.5 | 60.4 |        |
| Yes                                           | 28.3 | 7.2 | 42.4 | 7.3  | 38.4 | 7.7 | 42.7 | 7.8 | 43.2 | 4.7 | 56.8 |        |
| Number of healthcare visits in last 12 months |      |     |      |      |      |     |      |     |      |     |      | <0.001 |
| 0                                             | 16.5 | 6.7 | 30.0 | 6.0  | 30.6 | 8.3 | 28.3 | 5.2 | 27.7 | 5.9 | 40.0 |        |
| 1-3                                           | 46.5 | 8.0 | 44.4 | 8.7  | 40.8 | 7.6 | 46.9 | 6.4 | 44.5 | 7.6 | 57.3 |        |
| ≥4                                            | 36.9 | 8.5 | 51.1 | 10.1 | 47.0 | 8.5 | 51.5 | 6.3 | 47.6 | 6.1 | 61.9 |        |

<sup>a</sup>Chi-square test of association between potentially harmful supplement use and CKD status within characteristic, among those taking a dietary supplement.

<sup>b</sup> Defined using the US Census Bureau's poverty index ratio (PIR), the ratio of family income to federal poverty level, where  $\leq 1.00$  is considered below the poverty level.

<sup>c</sup>Cardiovascular disease includes , angina, heart attack, stroke, coronary artery disease, or congestive heart failure.

<sup>d</sup> Lifetime use of cigarettes ( $\geq 100$ ), snuff ( $\geq 20$  times), and/or chewing tobacco ( $\geq 20$  times).

<sup>e</sup> More than 7 drinks/week for women or more than 14 drinks/week for men.
