# Supplementary material
Source: PubMed Central journal article supplement (PMC3628413)
Supplement: NIHMS435924-supplement-03.pdf [file NIHMS435924-supplement-03.pdf]

**Table S3.** Odds ratios for taking a potentially harmful supplement (vs. any other supplement), among dietary supplement users (n=10,224) by CKD status (as defined by MDRD equation), NHANES 1999-2008

| Model                                                                    | CKD Status<br>(point estimated prevalence potentially harmful supplement use among dietary supplement users) |                    |            |              |                          |            |              |                          |            |                  |
|--------------------------------------------------------------------------|--------------------------------------------------------------------------------------------------------------|--------------------|------------|--------------|--------------------------|------------|--------------|--------------------------|------------|------------------|
|                                                                          | No CKD<br>(reference)<br>(17.4%)                                                                             | At risk<br>(14.8%) |            |              | CKD stage 1/2<br>(12.5%) |            |              | CKD stage 3/4<br>(10.0%) |            |                  |
|                                                                          |                                                                                                              | OR                 | 95% CI     | p-value      | OR                       | 95% CI     | p-value      | OR                       | 95% CI     | p-value          |
| unadjusted                                                               | 1.0                                                                                                          | 0.82               | 0.71, 0.95 | <b>0.009</b> | 0.68                     | 0.52, 0.88 | <b>0.004</b> | 0.53                     | 0.41, 0.68 | <b>&lt;0.001</b> |
| + age group                                                              | 1.0                                                                                                          | 0.92               | 0.80, 1.08 | 0.3          | 0.82                     | 0.63, 1.07 | 0.1          | 0.80                     | 0.60, 1.06 | 0.1              |
| + gender,<br>race/ethnicity                                              | 1.0                                                                                                          | 0.92               | 0.79, 1.07 | 0.3          | 0.82                     | 0.63, 1.07 | 0.1          | 0.81                     | 0.61, 1.07 | 0.1              |
| + education,<br>income                                                   | 1.0                                                                                                          | 0.93               | 0.80, 1.09 | 0.3          | 0.84                     | 0.64, 1.09 | 0.2          | 0.82                     | 0.61,1.10  | 0.2              |
| + arthritis,<br>cancer, tobacco<br>and alcohol use,<br>healthcare visits | 1.0                                                                                                          | 0.93               | 0.80, 1.09 | 0.4          | 0.84                     | 0.65, 1.09 | 0.2          | 0.81                     | 0.61, 1.10 | 0.2              |

CKD=chronic kidney disease; OR=odds ratio.
