# Supplementary material
Source: PubMed Central journal article supplement (PMC3628413)

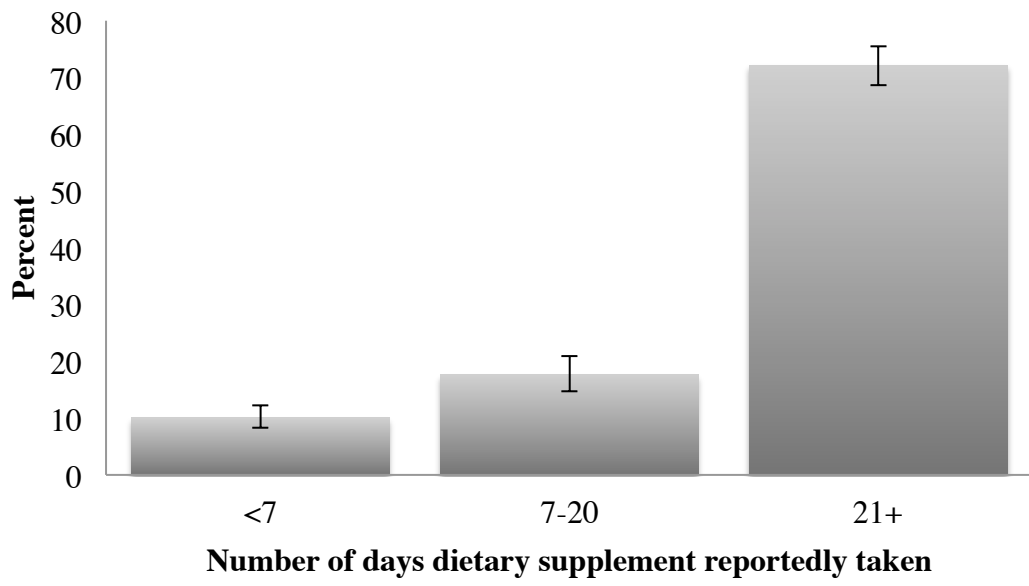

Supplement: NIHMS435924-supplement-04.pdf [file NIHMS435924-supplement-04.pdf]

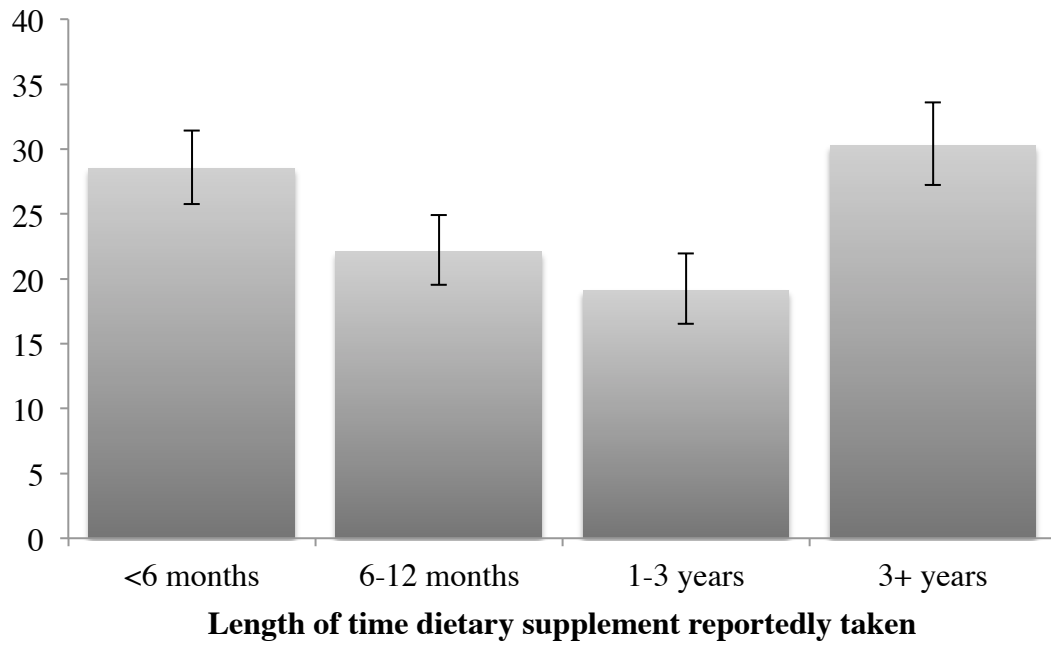

Supplement: NIHMS435924-supplement-05.pdf [file NIHMS435924-supplement-05.pdf]
